# Supplementary material for: EOT20: A global ocean tide model from multi-mission satellite altimetry
Source: Copernicus journal article supplement (doi:10.5194/essd-2021-97), 2021-03-26

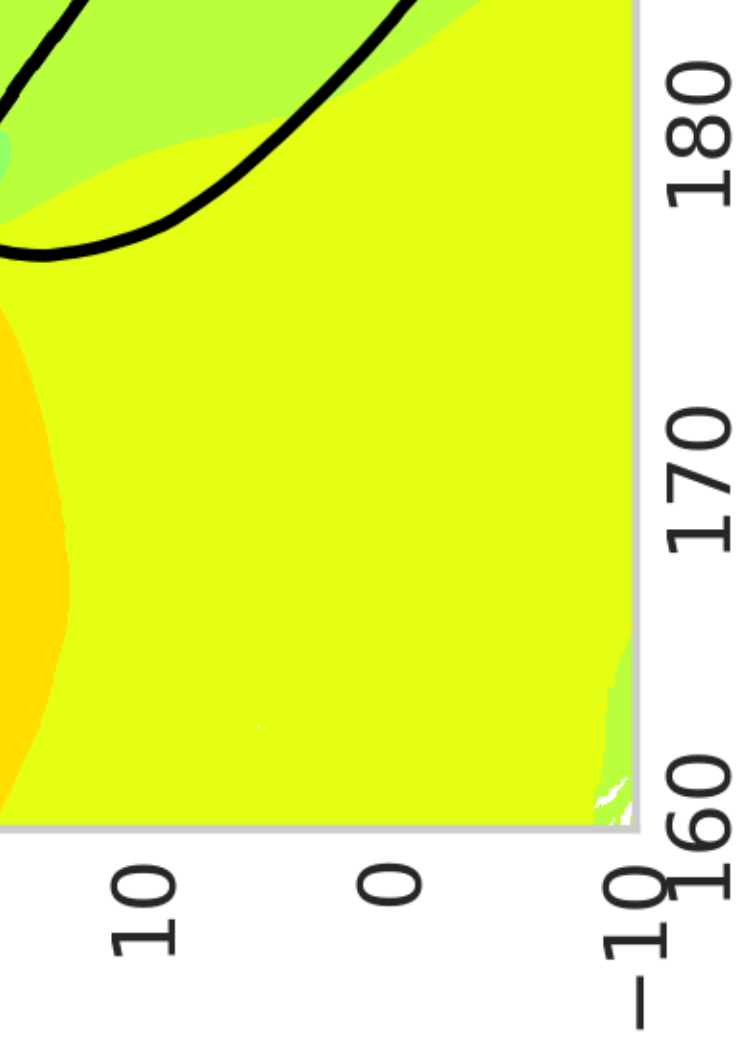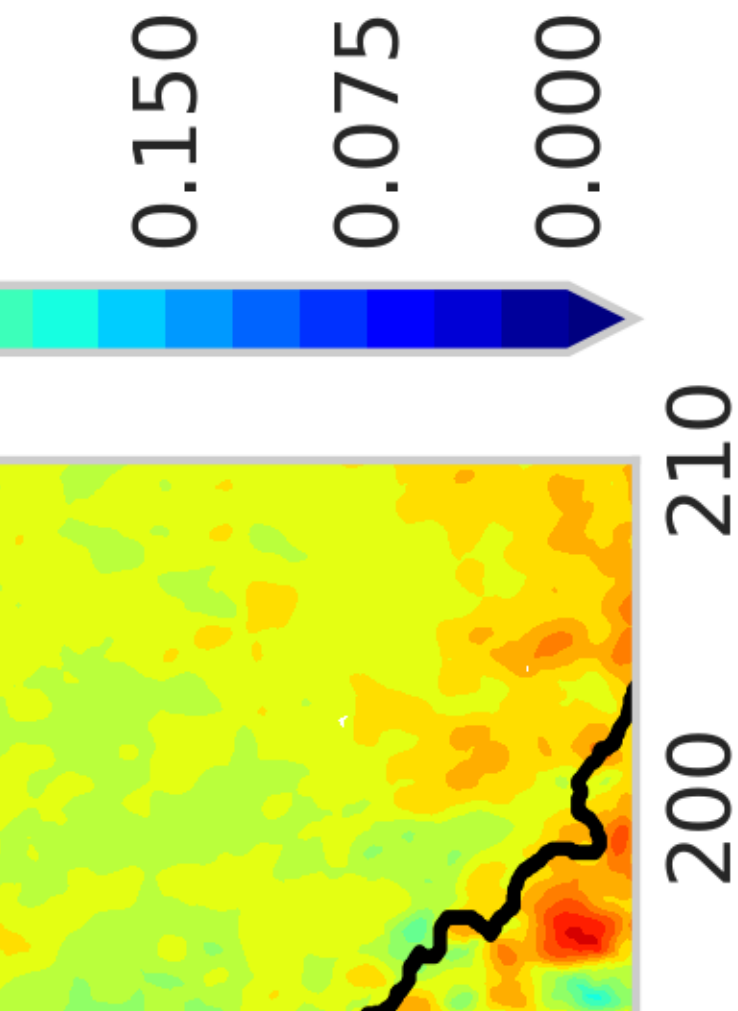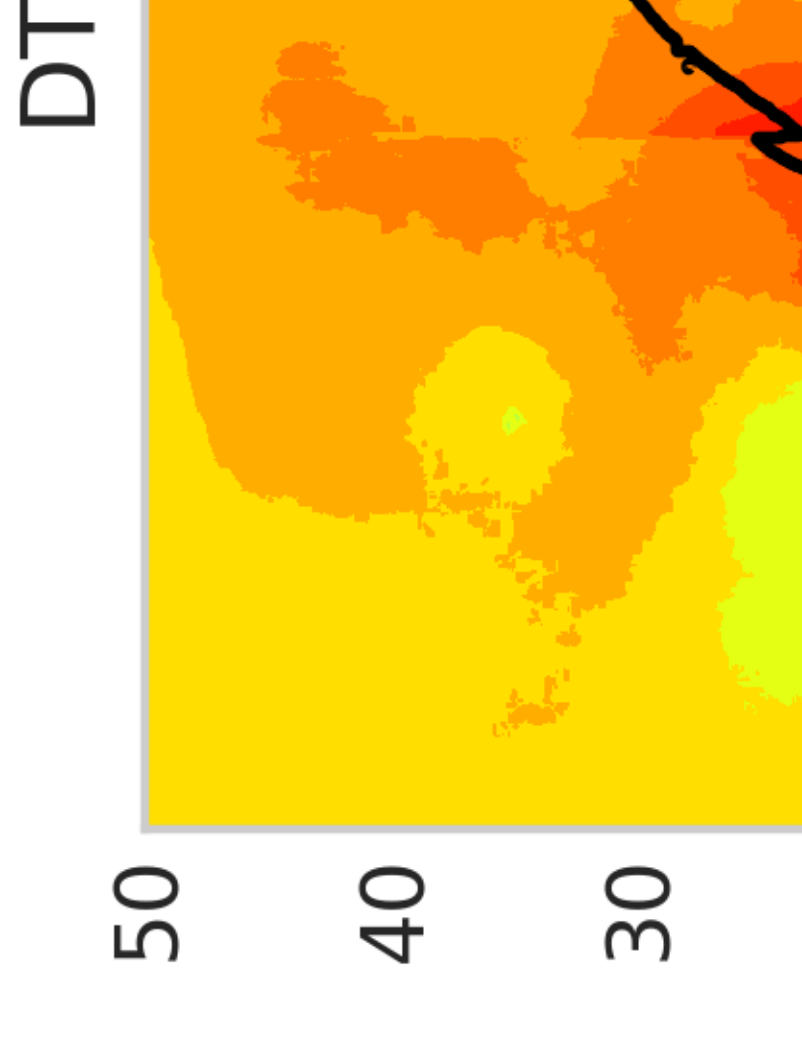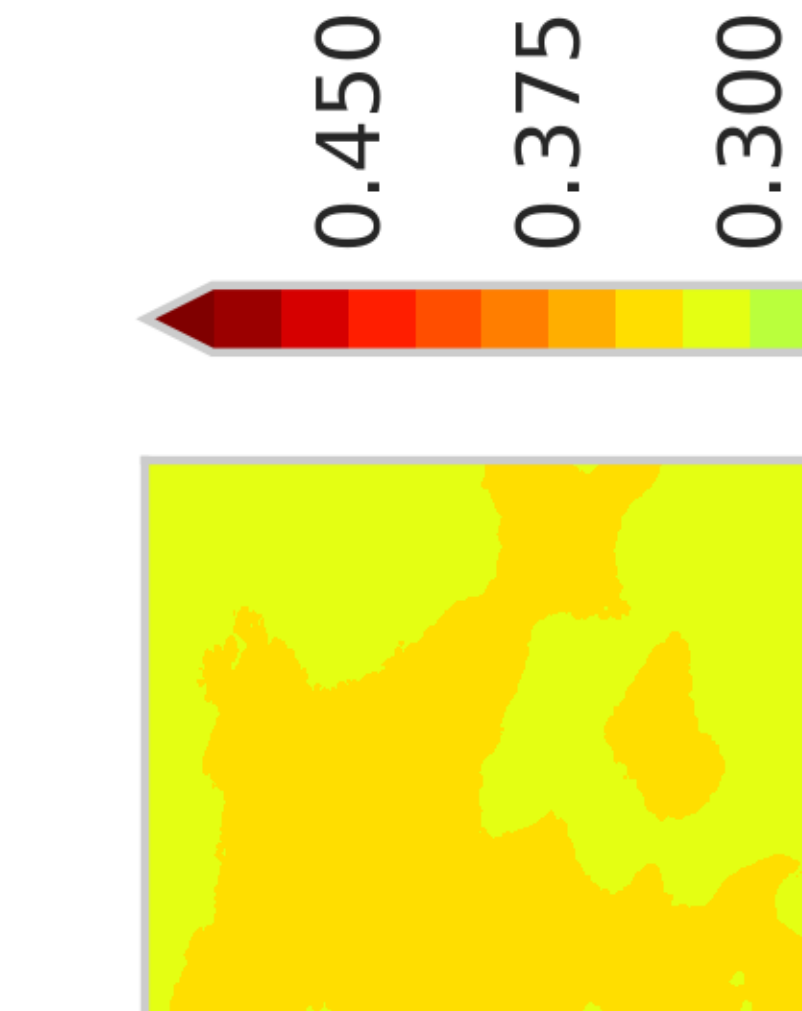

Supplement: Supplementary file [file essd-2021-97-AC1-supplement.pdf]
